# Supplementary material for: Enhanced photocatalytic performance and stability of visible-light-driven Z-scheme CdS/Ag/g-C3N4 nanosheets photocatalyst
Source: Royal Society of Chemistry journal article supplement (doi:10.1039/c8nj02057d), 2018-01-01
Supplement: c8nj02057d1.pdf [file c8nj02057d1.pdf]

## ***Supplementary Material***

### **Enhanced photocatalytic performance and stability of visible-light-driven Z-scheme CdS/Ag/g-C<sub>3</sub>N<sub>4</sub> nanosheets photocatalyst**

**Yingying Qin<sup>a</sup>, Hong Li<sup>a, \*</sup>, Hongjun Dong<sup>b</sup>, Changchang Ma<sup>b</sup>, Xiuying Li<sup>b</sup>, Xinlin Liu<sup>c</sup>, Yang Liu<sup>d</sup>, Chunxiang Li<sup>b</sup>, Yongsheng Yan<sup>b, \*</sup>**

<sup>a</sup> *Research Center of Fluid Machinery Engineering and Technology, Jiangsu University, Zhenjiang, 212013, China*

<sup>b</sup> *Institute of Green Chemistry and Chemical Technology, School of Chemistry and Chemical Engineering, Jiangsu University, Zhenjiang 212013, China*

<sup>c</sup> *School of Energy and Power Engineering, Jiangsu University, Zhenjiang, 212013, China*

<sup>d</sup> *School of physics, Jilin Normal University, Siping, 136000, China*

\* Corresponding authors:

E-mail addresses: hli@mail.ujs.edu.cn (H. Li); yys@mail.ujs.edu.cn (Y.S. Yan)

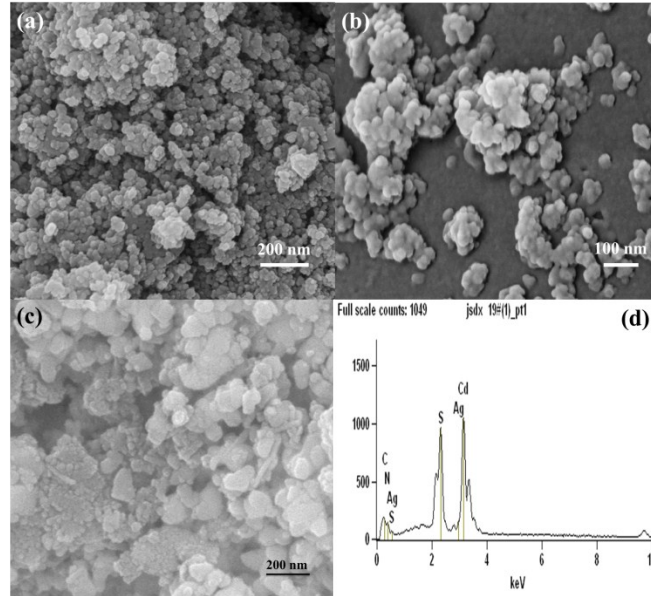

**Fig. S1.** SEM images of CdS/Ag/g-C<sub>3</sub>N<sub>4</sub> (a-c) and EDS spectra of CdS/Ag/g-C<sub>3</sub>N<sub>4</sub> (d).

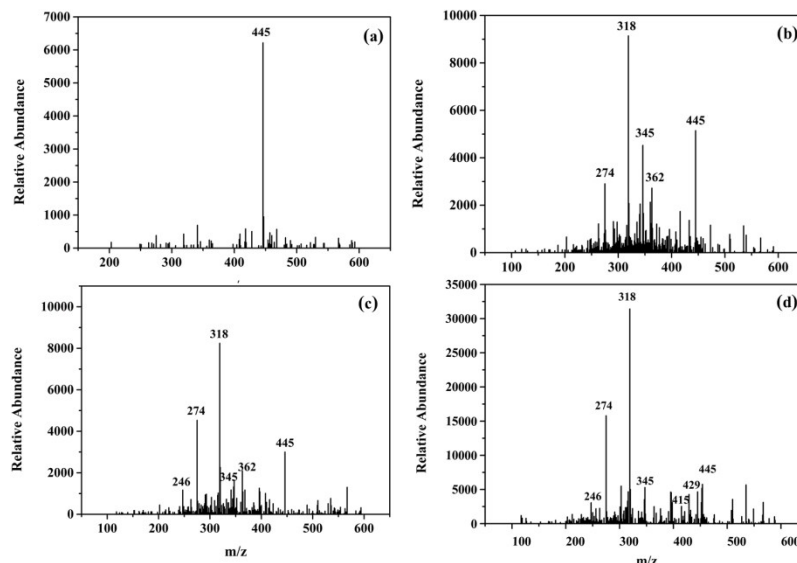

**Fig. S2.**  $m/z$  of degrading tetracycline over CdS/Ag/g-C<sub>3</sub>N<sub>4</sub> NSs composite photocatalyst: the initial tetracycline solution (a); degradation of tetracycline after 30 min (b); degradation of tetracycline after 70 min (c), degradation of tetracycline after 90 min (d).
